# Supplementary material
Source: PubMed Central journal article supplement (PMC10243137)
Supplement: NIHMS1900611-supplement-Supplemental.pdf [file NIHMS1900611-supplement-Supplemental.pdf]

## Supplementary Appendix

Supplement to: Gee JE, Bower WA, Kunkel A, et al. Multistate outbreak of melioidosis associated with imported aromatherapy spray. *N Engl J Med* 2022;386:861-8. DOI: 10.1056/NEJMoa2116130

This appendix has been provided by the authors to give readers additional information about the work.

2

3 NEJM Supplemental

4 Imported Aromatherapy Spray Associated Multi-State Outbreak of Melioidosis 2021 – United States

5 21-16130

6 Table of Contents

7 1. Investigators

8 2. Methods

9 3. Laboratory Analysis

10 4. Treatment Recommendations

11 5. References

12

13 1. Investigators

14 Jay E. Gee<sup>1</sup>, Ph.D., William A. Bower<sup>1</sup>, M.D., Amber Kunkel<sup>2,3</sup>, Sc.D, Julia Petras<sup>1,2</sup>, M.S.P.H., B.S.N, R.N., Jenna  
15 Gettings<sup>2,9</sup>, D.V.M., M.P.H. , Maria Bye<sup>4</sup>, M.P.H, Melanie Firestone<sup>2,4</sup>, Ph.D, M.P.H, Mindy G. Elrod<sup>1</sup>, Lindy  
16 Liu<sup>1</sup>, M.P.H, David D. Blaney<sup>1</sup>, M.D., Allison Zaldivar<sup>5</sup>, M.P.H, Chelsea Raybern<sup>5</sup>, M.P.H., Farah S. Ahmed<sup>5</sup>,  
17 Ph.D., M.P.H., Heidi Threadgill Honza<sup>6</sup>, M.P.H., Shelley Stonecipher<sup>6</sup>, D.V.M., M.P.H., Briana O’Sullivan<sup>7</sup>,  
18 M.P.H., Ruth Lynfield<sup>4</sup>, M.D., Melissa Hunter<sup>8</sup>, M.P.H., Skyler Brennan<sup>9</sup>, M.P.H., Jessica Pavlick<sup>9</sup>, Dr.P.H.,  
19 M.P.H., Julie Gabel<sup>9</sup>, D.V.M. M.P.H., Cherie Drenzek<sup>9</sup>, D.V.M. M.S., Rachel Geller<sup>10,11</sup>, M.D., Crystal Lee<sup>10</sup>,  
20 M.P.H., Jana M. Ritter<sup>12</sup>, D.V.M, Sherif R. Zaki<sup>12</sup>, M.D., Ph.D., Christopher A. Gulvik<sup>1</sup>, Ph.D., W. Wyatt Wilson<sup>2</sup>,  
21 <sup>13</sup>,M.D., M.S.P.H., Elizabeth Beshearse<sup>2,13</sup>, Ph.D., M.P.H., R.N., Bart J. Currie<sup>14</sup>, F.R.A.C.P., F.A.F.P.H.M., Jessica  
22 R. Webb<sup>14,15</sup>, Ph.D., Zachary P. Weiner<sup>1</sup>, Ph.D., María E. Negrón<sup>1</sup>, D.V.M, M.S., Ph.D, and Alex R.  
23 Hoffmaster<sup>1</sup>, Ph.D.

24 <sup>1</sup>Bacterial Special Pathogens Branch, Division of High-Consequence Pathogens and Pathology, Centers for  
25 Disease Control and Prevention, Atlanta, GA, USA

26 <sup>2</sup>Epidemic Intelligence Service, Centers for Disease Control and Prevention, Atlanta, GA, USA

27 <sup>3</sup>Poxvirus and Rabies Branch, Division of High-Consequence Pathogens and Pathology, Centers for Disease  
28 Control and Prevention, Atlanta, GA, USA

29 <sup>4</sup>Minnesota Department of Health, St. Paul, MN, USA

30 <sup>5</sup>Kansas Department of Health and Environment, Topeka, KS, USA

31 <sup>6</sup>Public Health Region 2/3, Texas Department of State Health Services, Arlington TX, USA

32 <sup>7</sup>Texas Department of State Health Services, Austin, TX, USA

33 <sup>8</sup>Public Health District 1-1, Georgia Department of Public Health, Rome, GA, USA

34 <sup>9</sup>Georgia Department of Public Health, Atlanta, GA, USA

35 <sup>10</sup>Dekalb County Medical Examiner’s Office, Decatur, GA, USA

36 <sup>11</sup>Department of Pathology and Laboratory Medicine, Emory University, Atlanta, GA, USA

37 <sup>12</sup>Infectious Diseases Pathology Branch, Division of High-Consequence Pathogens and Pathology, Centers for  
38 Disease Control and Prevention, Atlanta, GA, USA

39 <sup>13</sup>Prevention and Response Branch, Division of Healthcare Quality Promotion, Centers for Disease Control  
40 and Prevention, Atlanta, GA, USA

41 <sup>14</sup>Menzies School of Health Research, Charles Darwin University and Royal Darwin Hospital, Darwin,  
42 Northern Territory, Australia

43 <sup>15</sup>Department of Microbiology and Immunology, Peter Doherty Institute for Infection and Immunity, The  
44 University of Melbourne, Melbourne, Australia

45 2. Methods

46 Designed study: Jay E. Gee, William A. Bower, Alex R. Hoffmaster, Zachary P. Weiner. Gathered and analyzed  
47 Data: Jay E. Gee, William A. Bower, Amber Kunkel, Julia Petras, Jenna Gettings, Maria Bye, Melanie  
48 Firestone, Mindy G. Elrod, Lindy Liu, Allison Zaldivar, Chelsea Raybern, Farah S. Ahmed, Heidi Threadgill  
49 Honza, Shelley Stonecipher, Briana O’Sullivan, Ruth Lynfield, Melissa Hunter, Skyler Brennan, Jessica Pavlick,  
50 Julie Gabel, Cherie Drenzek, Rachel Geller, Crystal Lee, Jana M. Ritter, Sherif R. Zaki, Christopher A. Gulvik,  
51 W. Wyatt Wilson, Elizabeth Beshearse, Zachary P. Weiner, David D. Blaney, María E. Negrón. Vouches for

52 data and analysis: William A. Bower, Zachary P. Weiner, Alex R. Hoffmaster. Wrote the paper: Jay E. Gee,  
53 William A. Bower, Mindy G. Elrod, Julia Petras, Alex R. Hoffmaster. Decided to publish paper: Alex R.  
54 Hoffmaster.

55

56 Isolates of *B. pseudomallei* from patients (i.e. KS2021a, TX2021a, MN2021a, and GA2021a) were submitted  
57 by the state health departments to the CDC for analysis. In collaboration with CDC, Health Departments in  
58 Kansas, Texas, Minnesota, and Georgia interviewed patients, if possible, and family members to determine  
59 potential exposures to *B. pseudomallei*. Environmental and/or household products were tested from each of  
60 the 4 patients' homes. Items selected were diverse based on possible topical, ingestion, or inhaled exposure.  
61 Over 200 samples were tested and included swabs from and samples of aerosol spray products, aquariums,  
62 food, soaps, hand sanitizer, household cleaning products, insecticides, personal care products, medications,  
63 pet supplies, soil, vitamins, and water. Samples were tested for the presence of *B. pseudomallei* using  
64 consensus guidelines for environmental sampling with some modifications including the use of the Qiagen  
65 EZ1 advanced XL instrument with the EZ1 advanced XL tissue card and EZ1 DNA tissue kit<sup>1-3</sup>.

66 During the course of the investigation, a bottle of Better Homes and Gardens-branded Essential Oil and  
67 Semi-precious Stone Infused Aromatherapy Room Spray "Lavender & Chamomile" found in the home of  
68 patient 4 was found to be positive for *B. pseudomallei* and an isolate (GA2021\_Spray\_1A) from it was used  
69 for further analysis. Additional testing of other bottles from the same product line is ongoing. The isolates  
70 underwent whole genome sequencing (WGS). Sequences were deposited in NCBI under PRJNA763213.  
71 Isolates were analyzed as previously described for multilocus sequence typing (MLST) and phylogeography<sup>4-</sup>  
72 7.

73

74 3. Laboratory Analysis

75 Analysis of single nucleotide polymorphisms (SNPs) showed that all five isolates differentiated by < 10 SNPs,  
76 indicating clonality and suggesting that all patients were exposed to the same aromatherapy product or  
77 different products sharing the same contaminated component used for the spray bottle associated with  
78 patient 4. We have designated the name “ATS2021” (i.e. Aromatherapy Spray 2021) for this strain. Strain  
79 ATS2021 was not a close match to any of the 1,696 *B. pseudomallei* genomes publicly available in RefSeq,  
80 although it clustered closest to examples from India and Sri Lanka (Figure 3 of main text). The contaminated  
81 spray bottle found in the home of patient 4, Better Homes and Gardens-branded Essential Oil Infused  
82 Aromatherapy Room Spray with Gemstones “Lavender & Chamomile”, was imported from India. The strain  
83 yielded a novel sequence type, ST-1941, by MLST<sup>7</sup>.

#### 84 4. Treatment Recommendations

85 Treatment for melioidosis with intravenous antibiotics (e.g., ceftazidime or meropenem) for at least two  
86 weeks is recommended. Intravenous treatment may be extended for up to eight weeks depending on  
87 response. To prevent relapse intravenous treatment is followed by oral trimethoprim-sulfamethoxazole  
88 (TMP/SMX) for three to six months. Amoxicillin/clavulanic acid or doxycycline may be used in patients with a  
89 contraindication to, or who cannot tolerate, TMP/SMX<sup>8</sup>.

90

#### 91 5. References

- 92 1. Novak RT, Glass MB, Gee JE, et al. Development and evaluation of a real-time PCR assay targeting the  
93 type III secretion system of *Burkholderia pseudomallei*. J Clin Microbiol 2006;44(1):85-90. (Research  
94 Support, Non-U.S. Gov't) (In eng). DOI: 10.1128/JCM.44.1.85-90.2006.
- 95 2. Dawson P, Duwell MM, Elrod MG, et al. Novel Transmission of *Burkholderia pseudomallei* from a  
96 Freshwater Home Aquarium Causing Melioidosis in a Person in the U.S.A. Emerg Infect Dis 2021;27(12).  
97 DOI: 10.3201/eid2712.211756.
- 98 3. Limmathurotsakul D, Dance DA, Wuthiekanun V, et al. Systematic review and consensus guidelines for  
99 environmental sampling of *Burkholderia pseudomallei*. PLoS Negl Trop Dis 2013;7(3):e2105. DOI:  
100 10.1371/journal.pntd.0002105.
- 101 4. Gee JE, Gulvik CA, Castelo-Branco D, et al. Genomic Diversity of *Burkholderia pseudomallei* in Ceara,  
102 Brazil. mSphere 2021;6(1). DOI: 10.1128/mSphere.01259-20.
- 103 5. Jolley KA, Bray JE, Maiden MCJ. Open-access bacterial population genomics: BIGSdb software, the  
104 PubMLST.org website and their applications. Wellcome Open Res 2018;3:124. DOI:  
105 10.12688/wellcomeopenres.14826.1.

- 106 6. Glass MB, Gee JE, Steigerwalt AG, et al. Pneumonia and septicemia caused by *Burkholderia thailandensis*  
107 in the United States. J Clin Microbiol 2006;44(12):4601-4. (Case Reports) (In eng). DOI:  
108 10.1128/JCM.01585-06.
- 109 7. Godoy D, Randle G, Simpson AJ, et al. Multilocus sequence typing and evolutionary relationships among  
110 the causative agents of melioidosis and glanders, *Burkholderia pseudomallei* and *Burkholderia mallei*. J  
111 Clin Microbiol 2003;41(5):2068-79.
- 112 8. Sullivan RP, Marshall CS, Anstey NM, Ward L, Currie BJ. 2020 Review and revision of the 2015 Darwin  
113 melioidosis treatment guideline; paradigm drift not shift. PLoS Negl Trop Dis 2020;14(9):e0008659. DOI:  
114 10.1371/journal.pntd.0008659.

115
